# Supplementary material for: INHBB Is a Novel Prognostic Biomarker Associated with Cancer‐Promoting Pathways in Colorectal Cancer
Source: Hindawi journal article supplement (doi:10.1155/2020/6909672), 2020-01-01
Supplement: f1 [file 6909672.f1.pdf]

Supplementary Table 1 The methylation difference of 25 CpG sites between CRC tissue and normal control.

| CpG sites  | normal( $\beta$ value) | tumor( $\beta$ value) | log <sub>2</sub> (fold change) | <i>P</i> _value |
|------------|------------------------|-----------------------|--------------------------------|-----------------|
| cg20925841 | 0.041362883            | 0.427422513           | 3.369254249                    | 7.29E-11        |
| cg02173749 | 0.035781908            | 0.336779487           | 3.234502044                    | 1.02E-09        |
| cg19089337 | 0.022291539            | 0.131736361           | 2.563085475                    | 0.02            |
| cg24009722 | 0.051862481            | 0.264345691           | 2.349662681                    | 7.10E-09        |
| cg27476576 | 0.01385588             | 0.069097062           | 2.318126028                    | 0.007           |
| cg04439159 | 0.03942053             | 0.184057578           | 2.223138071                    | 0.00005818      |
| cg07197823 | 0.020665693            | 0.081894672           | 1.986531851                    | 0.495           |
| cg03699182 | 0.141575407            | 0.492014369           | 1.797129772                    | 2.65E-13        |
| cg07736658 | 0.072513836            | 0.241176289           | 1.733759877                    | 1.70E-11        |
| cg24617696 | 0.10793421             | 0.351625428           | 1.703887201                    | 8.18E-09        |
| cg23397015 | 0.090336255            | 0.244397718           | 1.435853803                    | 0.009           |
| cg06342317 | 0.158959681            | 0.336003502           | 1.079815387                    | 2.70E-07        |
| cg26035105 | 0.13865016             | 0.224358618           | 0.69435732                     | 0.027           |
| cg03175975 | 0.399867191            | 0.503305312           | 0.331912911                    | 0.00009473      |
| cg09174690 | 0.705983191            | 0.747367164           | 0.082183345                    | 0.00001117      |
| cg08065733 | 0.451959988            | 0.469076979           | 0.053629643                    | 0.221           |
| cg20495333 | 0.793327824            | 0.822009171           | 0.051237341                    | 0.000001577     |
| cg14105566 | 0.666836067            | 0.686711543           | 0.042372077                    | 0.008           |
| cg03077533 | 0.842043509            | 0.840717261           | -0.002274087                   | 0.28            |
| cg14551952 | 0.977975393            | 0.964569775           | -0.019912562                   | 0.189           |
| cg23323827 | 0.92141707             | 0.896070933           | -0.040241385                   | 0.017           |
| cg13377839 | 0.879817862            | 0.801361015           | -0.134752564                   | 1.89E-07        |
| cg25501422 | 0.507801149            | 0.433316973           | -0.228840911                   | 6.06E-09        |
| cg00421221 | 0.216174848            | 0.177825508           | -0.28173639                    | 3.02E-04        |
| cg09932405 | 0.784990926            | 0.606336335           | -0.372557698                   | 4.33E-12        |

Supplementary Table 2 The relationship between INHBB expression and 25 CpG sites methylation.

| CpG sites  | Correlation | <i>P</i> _value |
|------------|-------------|-----------------|
| cg20925841 | -0.278      | 7.29E-11        |
| cg02173749 | -0.21       | 1.02E-09        |
| cg19089337 | -0.233      | 0.02            |
| cg24009722 | -0.189      | 7.10E-09        |
| cg27476576 | -0.207      | 0.007           |
| cg04439159 | -0.194      | 0.00005818      |
| cg07197823 | -0.22       | 0.495           |
| cg03699182 | -0.304      | 2.65E-13        |
| cg07736658 | -0.235      | 1.70E-11        |
| cg24617696 | -0.289      | 8.18E-09        |
| cg23397015 | -0.336      | 0.009           |
| cg06342317 | -0.221      | 2.70E-07        |
| cg26035105 | -0.064      | 0.027           |
| cg03175975 | -0.198      | 0.00009473      |
| cg09174690 | 0.057       | 0.00001117      |
| cg08065733 | 0.088       | 0.221           |
| cg20495333 | 0.158       | 0.000001577     |
| cg14105566 | 0.227       | 0.008           |
| cg03077533 | -0.003      | 0.28            |
| cg14551952 | 0.064       | 0.189           |
| cg23323827 | 0.11        | 0.017           |
| cg13377839 | 0.218       | 1.89E-07        |
| cg25501422 | 0.237       | 6.06E-09        |
| cg00421221 | 0.093       | 3.02E-04        |
| cg09932405 | 0.163       | 4.33E-12        |
